# Supplementary material
Source: MDPI journal article supplement (https://www.mdpi.com/2076-3417/13/13/7670)
Supplement: s1 [file s1]

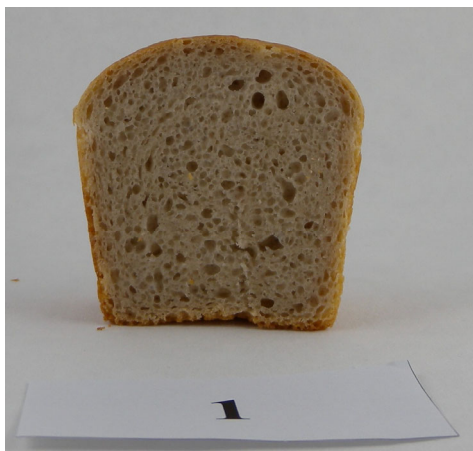

**Figure S1 SB**

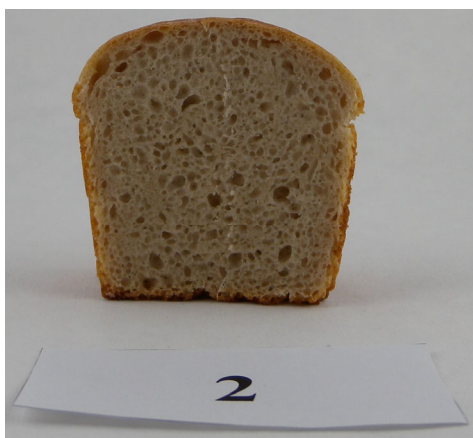

**Figure S2 E0PP\_T1**

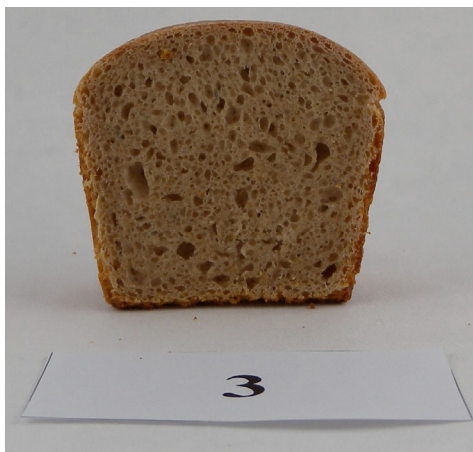

**Figure S3** E30PP\_T1

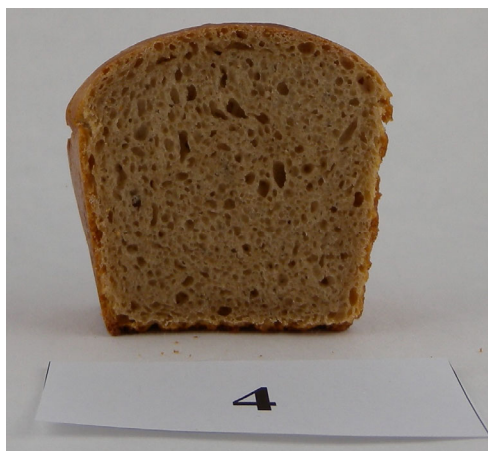

**Figure S4** E40PP\_T1

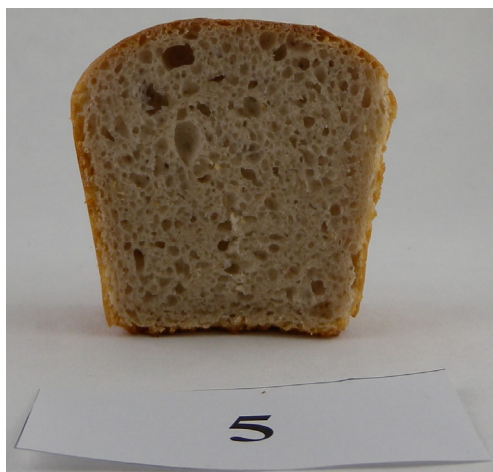

**Figure S5** E0PP\_T2

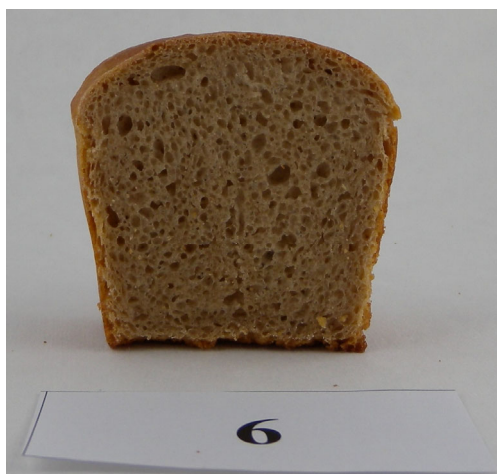

**Figure S6 E30PP\_T2**

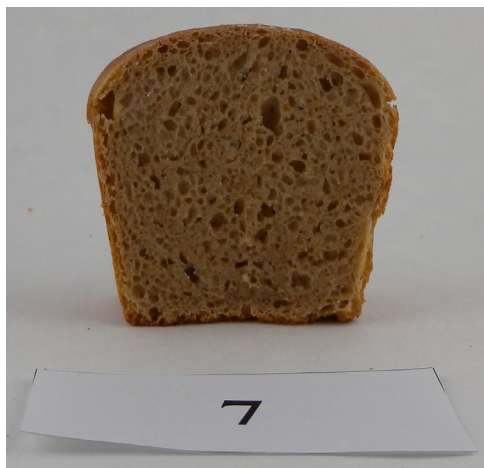

**Figure S7 E40PP\_T2**

**Table S1.** Results of pH and acidity determinations for dough and bread crumb

| Kind of technologies                                                    | Type of preparation used | Initial pH of the dough  | pH of the dough after fermentation | Initial TTA of the dough  | Dough TTA after fermentation | TTA of bread crumb       |
|-------------------------------------------------------------------------|--------------------------|--------------------------|------------------------------------|---------------------------|------------------------------|--------------------------|
|                                                                         |                          |                          |                                    | ml 1M NaOH/100g sample    |                              |                          |
| Average value and differentiating based on different technology         |                          |                          |                                    |                           |                              |                          |
| SB                                                                      |                          | 4.33 <sup>a</sup> ± 0.01 | 4.28 <sup>a</sup> ± 0.01           | 6.65 <sup>a</sup> ± 0.65  | 7.11 <sup>a</sup> ± 0.18     | 5.95 <sup>a</sup> ± 0.26 |
| T1                                                                      |                          | 4.32 <sup>a</sup> ± 0.03 | 4.32 <sup>b</sup> ± 0.03           | 6.77 <sup>a</sup> ± 0.60  | 8.26 <sup>b</sup> ± 0.35     | 6.35 <sup>b</sup> ± 0.31 |
| T2                                                                      |                          | 4.35 <sup>b</sup> ± 0.03 | 4.33 <sup>b</sup> ± 0.02           | 6.32 <sup>a</sup> ± 0.43  | 8.15 <sup>b</sup> ± 1.06     | 6.40 <sup>b</sup> ± 0.25 |
| Average value and differentiating based on the type of preparation used |                          |                          |                                    |                           |                              |                          |
|                                                                         | SB                       | 4.33 <sup>a</sup> ± 0.01 | 4.28 <sup>a</sup> ± 0.01           | 6.65 <sup>a</sup> ± 0.65  | 7.11 <sup>a</sup> ± 0.18     | 5.95 <sup>a</sup> ± 0.26 |
|                                                                         | E0PP                     | 4.33 <sup>a</sup> ± 0.05 | 4.31 <sup>b</sup> ± 0.03           | 6.63 <sup>a</sup> ± 0.94  | 7.49 <sup>a</sup> ± 0.79     | 6.28 <sup>b</sup> ± 0.36 |
|                                                                         | E30PP                    | 4.32 <sup>a</sup> ± 0.01 | 4.34 <sup>c</sup> ± 0.01           | 6.71 <sup>a</sup> ± 0.24  | 8.80 <sup>b</sup> ± 0.22     | 6.50 <sup>b</sup> ± 0.12 |
|                                                                         | E40PP                    | 4.37 <sup>b</sup> ± 0.01 | 4.32 <sup>b</sup> ± 0.01           | 6.29 <sup>a</sup> ± 0.23  | 8.33 <sup>b</sup> ± 0.48     | 6.35 <sup>b</sup> ± 0.30 |
| Average value and differentiating based on mixed effect                 |                          |                          |                                    |                           |                              |                          |
| SB                                                                      | SB                       | 4.33 <sup>b</sup> ± 0.01 | 4.28 <sup>a</sup> ± 0.01           | 6.65 <sup>ab</sup> ± 0.65 | 7.11 <sup>a</sup> ± 0.18     | 5.95 <sup>a</sup> ± 0.26 |
| T1                                                                      | E0PP                     | 4.29 <sup>a</sup> ± 0.0  | 4.28 <sup>a</sup> ± 0.01           | 7.39 <sup>b</sup> ± 0.47  | 8.13 <sup>b</sup> ± 0.07     | 5.96 <sup>a</sup> ± 0.01 |
| T1                                                                      | E30PP                    | 4.32 <sup>b</sup> ± 0.01 | 4.35 <sup>c</sup> ± 0.01           | 6.65 <sup>ab</sup> ± 0.37 | 8.62 <sup>bc</sup> ± 0.13    | 6.49 <sup>b</sup> ± 0.15 |
| T1                                                                      | E40PP                    | 4.37 <sup>c</sup> ± 0.01 | 4.33 <sup>bc</sup> ± 0.01          | 6.27 <sup>a</sup> ± 0.38  | 8.04 <sup>b</sup> ± 0.42     | 6.60 <sup>b</sup> ± 0.0  |
| T2                                                                      | E0PP                     | 4.38 <sup>c</sup> ± 0.01 | 4.34 <sup>c</sup> ± 0.01           | 5.86 <sup>a</sup> ± 0.23  | 6.84 <sup>a</sup> ± 0.46     | 6.59 <sup>b</sup> ± 0.0  |
| T2                                                                      | E30PP                    | 4.32 <sup>b</sup> ± 0.01 | 4.34 <sup>c</sup> ± 0.01           | 6.77 <sup>ab</sup> ± 0.15 | 8.98 <sup>c</sup> ± 0.07     | 6.50 <sup>b</sup> ± 0.14 |
| T2                                                                      | E40PP                    | 4.37 <sup>c</sup> ± 0.01 | 4.31 <sup>b</sup> ± 0.01           | 6.32 <sup>a</sup> ± 0.06  | 8.62 <sup>bc</sup> ± 0.41    | 6.10 <sup>a</sup> ± 0.15 |

**Table S2:** Quality features of bread with the use of the tested preparations

| Kind of technologies                                                    | Type of preparation used | Weight of loaf (g)         | Volume (cm <sup>3</sup> )   | Yield (%)                   | Baking loss (%)            |
|-------------------------------------------------------------------------|--------------------------|----------------------------|-----------------------------|-----------------------------|----------------------------|
| Average value and differentiating based on different technology         |                          |                            |                             |                             |                            |
| SB                                                                      |                          | 83.74 <sup>b</sup> ± 0.90  | 198.13 <sup>b</sup> ± 1.83  | 140.26 <sup>b</sup> ± 1.51  | 16.26 <sup>a</sup> ± 0.90  |
| T1                                                                      |                          | 83.05 <sup>a</sup> ± 0.49  | 190.25 <sup>a</sup> ± 2.016 | 139.11 <sup>a</sup> ± 0.82  | 16.95 <sup>b</sup> ± 0.49  |
| T2                                                                      |                          | 82.96 <sup>a</sup> ± 0.43  | 199.92 <sup>c</sup> ± 5.026 | 138.96 <sup>a</sup> ± 0.72  | 17.04 <sup>b</sup> ± 0.43  |
| Average value and differentiating based on the type of preparation used |                          |                            |                             |                             |                            |
|                                                                         | SB                       | 83.74 <sup>b</sup> ± 0.90  | 198.13 <sup>b</sup> ± 1.83  | 140.26 <sup>b</sup> ± 1.51  | 16.26 <sup>a</sup> ± 0.90  |
|                                                                         | E0PP                     | 82.79 <sup>a</sup> ± 0.44  | 199.42 <sup>b</sup> ± 7.80  | 138.67 <sup>a</sup> ± 0.74  | 17.21 <sup>b</sup> ± 0.44  |
|                                                                         | E30PP                    | 83.15 <sup>a</sup> ± 0.58  | 193.56 <sup>a</sup> ± 4.84  | 139.27 <sup>a</sup> ± 0.98  | 16.85 <sup>b</sup> ± 0.58  |
|                                                                         | E40PP                    | 83.08 <sup>a</sup> ± 0.23  | 192.29 <sup>a</sup> ± 3.43  | 139.16 <sup>a</sup> ± 0.38  | 16.92 <sup>b</sup> ± 0.23  |
| Average value and differentiating based on mixed effect                 |                          |                            |                             |                             |                            |
| SB                                                                      | SB                       | 83.7 <sup>b</sup> ± 0.9    | 198.13 <sup>d</sup> ± 1.83  | 140.26 <sup>b</sup> ± 1.51  | 16.26 <sup>a</sup> ± 0.90  |
| T1                                                                      | E0PP                     | 82.98 <sup>ab</sup> ± 0.52 | 192.16 <sup>b</sup> ± 1.91  | 139.00 <sup>ab</sup> ± 0.88 | 17.01 <sup>ab</sup> ± 0.52 |
| T1                                                                      | E30PP                    | 83.04 <sup>ab</sup> ± 0.67 | 189.21 <sup>a</sup> ± 2.25  | 139.10 <sup>ab</sup> ± 1.13 | 16.96 <sup>ab</sup> ± 0.68 |
| T1                                                                      | E40PP                    | 83.11 <sup>ab</sup> ± 0.32 | 189.39 <sup>a</sup> ± 0.89  | 139.22 <sup>ab</sup> ± 0.53 | 16.89 <sup>ab</sup> ± 0.32 |
| T2                                                                      | E0PP                     | 82.59 <sup>a</sup> ± 0.24  | 206.68 <sup>e</sup> ± 1.16  | 138.33 <sup>a</sup> ± 0.40  | 17.41 <sup>b</sup> ± 0.24  |
| T2                                                                      | E30PP                    | 83.25 <sup>ab</sup> ± 0.53 | 197.89 <sup>d</sup> ± 0.77  | 139.45 <sup>ab</sup> ± 0.89 | 16.75 <sup>ab</sup> ± 0.53 |
| T2                                                                      | E40PP                    | 83.05 <sup>ab</sup> ± 0.11 | 195.17 <sup>c</sup> ± 2.16  | 139.10 <sup>ab</sup> ± 0.19 | 16.95 <sup>ab</sup> ± 0.11 |

**Table S3:** Color parameters for obtained bread

| Kind of technologies                                                    | Type of preparation used | Crumb                     |                          |                            | Crust                     |                           |                           |
|-------------------------------------------------------------------------|--------------------------|---------------------------|--------------------------|----------------------------|---------------------------|---------------------------|---------------------------|
|                                                                         |                          | L*                        | a *                      | b*                         | L*                        | a *                       | b*                        |
| Average value and differentiating based on different technology         |                          |                           |                          |                            |                           |                           |                           |
| SB                                                                      |                          | 60.70 <sup>c</sup> ± 0.39 | 4.00 <sup>a</sup> ± 0.03 | 19.25 <sup>a</sup> ± 0.06  | 52.62 <sup>c</sup> ± 0.32 | 16.82 <sup>c</sup> ± 0.19 | 36.82 <sup>c</sup> ± 0.14 |
| T1                                                                      |                          | 54.57 <sup>a</sup> ± 3.61 | 6.44 <sup>c</sup> ± 1.71 | 23.17 <sup>c</sup> ± 2.77  | 45.57 <sup>a</sup> ± 1.91 | 16.42 <sup>b</sup> ± 1.59 | 29.39 <sup>b</sup> ± 3.53 |
| T2                                                                      |                          | 54.97 <sup>b</sup> ± 4.29 | 6.37 <sup>b</sup> ± 1.78 | 22.65 <sup>b</sup> ± 2.57  | 49.39 <sup>b</sup> ± 5.29 | 14.01 <sup>a</sup> ± 3.33 | 27.43 <sup>a</sup> ± 2.14 |
| Average value and differentiating based on the type of preparation used |                          |                           |                          |                            |                           |                           |                           |
|                                                                         | SB                       | 60.70 <sup>d</sup> ± 0.39 | 4.00 <sup>a</sup> ± 0.03 | 19.25 <sup>a</sup> ± 0.06  | 52.62 <sup>c</sup> ± 0.32 | 16.82 <sup>c</sup> ± 0.19 | 36.82 <sup>d</sup> ± 0.14 |
|                                                                         | E0PP                     | 60.16 <sup>c</sup> ± 0.78 | 4.03 <sup>a</sup> ± 0.10 | 19.24 <sup>a</sup> ± 0.20  | 52.97 <sup>c</sup> ± 3.95 | 12.76 <sup>a</sup> ± 3.93 | 28.13 <sup>b</sup> ± 4.51 |
|                                                                         | E30PP                    | 53.40 <sup>b</sup> ± 0.28 | 7.15 <sup>b</sup> ± 0.08 | 24.30 <sup>b</sup> ± 0.35  | 44.43 <sup>a</sup> ± 0.74 | 15.77 <sup>b</sup> ± 1.48 | 27.11 <sup>a</sup> ± 2.05 |
|                                                                         | E40PP                    | 50.88 <sup>a</sup> ± 0.31 | 8.01 <sup>c</sup> ± 0.07 | 25.02 <sup>c</sup> ± 0.39  | 45.67 <sup>b</sup> ± 1.90 | 16.59 <sup>c</sup> ± 0.95 | 29.43 <sup>c</sup> ± 0.77 |
| Average value and differentiating based on mixed effect                 |                          |                           |                          |                            |                           |                           |                           |
| SB                                                                      | SB                       | 60.70 <sup>d</sup> ± 0.39 | 4.00 <sup>a</sup> ± 0.03 | 19.25 <sup>ab</sup> ± 0.06 | 52.62 <sup>e</sup> ± 0.32 | 16.82 <sup>c</sup> ± 0.19 | 36.82 <sup>f</sup> ± 0.14 |
| T1                                                                      | E0PP                     | 59.27 <sup>c</sup> ± 0.35 | 4.14 <sup>b</sup> ± 0.05 | 19.42 <sup>b</sup> ± 0.14  | 48.18 <sup>d</sup> ± 0.27 | 17.54 <sup>d</sup> ± 0.09 | 33.60 <sup>e</sup> ± 0.15 |
| T1                                                                      | E30PP                    | 53.43 <sup>b</sup> ± 0.16 | 7.23 <sup>d</sup> ± 0.04 | 24.62 <sup>d</sup> ± 0.06  | 45.06 <sup>b</sup> ± 0.14 | 14.37 <sup>b</sup> ± 0.16 | 25.19 <sup>b</sup> ± 0.40 |
| T1                                                                      | E40PP                    | 50.99 <sup>a</sup> ± 0.30 | 7.96 <sup>e</sup> ± 0.06 | 25.46 <sup>e</sup> ± 0.14  | 43.91 <sup>a</sup> ± 1.10 | 17.54 <sup>d</sup> ± 0.52 | 30.09 <sup>d</sup> ± 0.43 |
| T2                                                                      | E0PP                     | 60.71 <sup>d</sup> ± 0.24 | 3.97 <sup>a</sup> ± 0.06 | 19.13 <sup>a</sup> ± 0.15  | 55.96 <sup>f</sup> ± 0.29 | 9.78 <sup>a</sup> ± 0.08  | 24.71 <sup>a</sup> ± 0.17 |
| T2                                                                      | E30PP                    | 53.37 <sup>b</sup> ± 0.34 | 7.10 <sup>c</sup> ± 0.05 | 24.09 <sup>c</sup> ± 0.30  | 43.81 <sup>a</sup> ± 0.50 | 17.16 <sup>c</sup> ± 0.39 | 29.03 <sup>c</sup> ± 0.48 |
| T2                                                                      | E40PP                    | 50.82 <sup>a</sup> ± 0.32 | 8.04 <sup>f</sup> ± 0.05 | 24.74 <sup>d</sup> ± 0.12  | 47.02 <sup>c</sup> ± 1.04 | 15.88 <sup>b</sup> ± 0.39 | 28.94 <sup>c</sup> ± 0.56 |

**Table S4:** . Changes in the moisture content of the tested bread during storage

| Kind of technologies                                                    | Type of preparation used | Crumb moisture (g/100g)    |                            |                            |
|-------------------------------------------------------------------------|--------------------------|----------------------------|----------------------------|----------------------------|
|                                                                         |                          | Baking day                 | After 24 hrs               | After 48 hrs               |
| Average value and differentiating based on different technology         |                          |                            |                            |                            |
| SB                                                                      |                          | 43.14 <sup>c</sup> ± 0.51  | 41.75 <sup>c</sup> ± 0.36  | 41.20 <sup>c</sup> ± 0.14  |
| T1                                                                      |                          | 42.38 <sup>b</sup> ± 0.30  | 41.11 <sup>a</sup> ± 0.61  | 39.83 <sup>a</sup> ± 0.82  |
| T2                                                                      |                          | 41.70 <sup>a</sup> ± 0.40  | 41.44 <sup>ab</sup> ± 0.42 | 40.59 <sup>b</sup> ± 0.55  |
| Average value and differentiating based on the type of preparation used |                          |                            |                            |                            |
|                                                                         | SB                       | 43.14 <sup>c</sup> ± 0.51  | 41.75 <sup>c</sup> ± 0.36  | 41.20 <sup>c</sup> ± 0.14  |
|                                                                         | E0PP                     | 41.94 <sup>a</sup> ± 0.53  | 40.73 <sup>a</sup> ± 0.38  | 40.10 <sup>ab</sup> ± 0.26 |
|                                                                         | E30PP                    | 41.92 <sup>a</sup> ± 0.55  | 41.14 <sup>b</sup> ± 0.29  | 39.84 <sup>a</sup> ± 0.85  |
|                                                                         | E40PP                    | 42.21 <sup>a</sup> ± 0.40  | 41.79 <sup>c</sup> ± 0.31  | 40.62 <sup>bc</sup> ± 0.91 |
| Average value and differentiating based on mixed effect                 |                          |                            |                            |                            |
| SB                                                                      | SB                       | 43.14 <sup>c</sup> ± 0.51  | 41.75 <sup>c</sup> ± 0.36  | 41.20 <sup>c</sup> ± 0.14  |
| T1                                                                      | E0PP                     | 42.34 <sup>b</sup> ± 0.32  | 40.50 <sup>a</sup> ± 0.44  | 40.20 <sup>b</sup> ± 0.08  |
| T1                                                                      | E30PP                    | 42.44 <sup>b</sup> ± 0.23  | 40.96 <sup>ab</sup> ± 0.26 | 39.07 <sup>a</sup> ± 0.02  |
| T1                                                                      | E40PP                    | 42.37 <sup>b</sup> ± 0.40  | 41.72 <sup>c</sup> ± 0.40  | 40.11 <sup>b</sup> ± 1.09  |
| T2                                                                      | E0PP                     | 41.54 <sup>a</sup> ± 0.35  | 40.96 <sup>ab</sup> ± 0.11 | 40.03 <sup>b</sup> ± 0.34  |
| T2                                                                      | E30PP                    | 41.53 <sup>a</sup> ± 0.29  | 41.37 <sup>bc</sup> ± 0.10 | 40.60 <sup>bc</sup> ± 0.21 |
| T2                                                                      | E40PP                    | 42.05 <sup>ab</sup> ± 0.38 | 41.85 <sup>c</sup> ± 0.24  | 41.15 <sup>c</sup> ± 0.21  |

**Table S5:** Changes crumb hardness of the tested bread during storage

| Kind of technologies                                                    | Type of preparation used | Hardness (N)               |                            |                           |
|-------------------------------------------------------------------------|--------------------------|----------------------------|----------------------------|---------------------------|
|                                                                         |                          | Baking day                 | After 24 hrs               | After 48 hrs              |
| Average value and differentiating based on different technology         |                          |                            |                            |                           |
| SB                                                                      |                          | 10.20 <sup>b</sup> ± 1.27  | 19.98 <sup>ab</sup> ± 0.09 | 27.16 <sup>a</sup> ± 0.12 |
| T1                                                                      |                          | 10.55 <sup>b</sup> ± 0.94  | 21.40 <sup>b</sup> ± 0.86  | 27.52 <sup>a</sup> ± 4.88 |
| T2                                                                      |                          | 8.23 <sup>a</sup> ± 0.31   | 17.89 <sup>a</sup> ± 2.12  | 22.98 <sup>a</sup> ± 1.27 |
| Average value and differentiating based on the type of preparation used |                          |                            |                            |                           |
|                                                                         | SB                       | 10.20 <sup>a</sup> ± 1.27  | 19.98 <sup>ab</sup> ± 0.09 | 27.16 <sup>a</sup> ± 0.12 |
|                                                                         | E0PP                     | 9.72 <sup>a</sup> ± 1.98   | 18.93 <sup>a</sup> ± 4.08  | 27.01 <sup>a</sup> ± 6.48 |
|                                                                         | E30PP                    | 9.29 <sup>a</sup> ± 1.51   | 19.58 <sup>ab</sup> ± 1.32 | 23.66 <sup>a</sup> ± 1.96 |
|                                                                         | E40PP                    | 9.16 <sup>a</sup> ± 0.75   | 20.41 <sup>b</sup> ± 1.10  | 25.08 <sup>a</sup> ± 3.09 |
| Average value and differentiating based on mixed effect                 |                          |                            |                            |                           |
| SB                                                                      | SB                       | 10.20 <sup>bc</sup> ± 1.27 | 19.98 <sup>bc</sup> ± 0.09 | 27.16 <sup>a</sup> ± 0.12 |
| T1                                                                      | E0PP                     | 11.34 <sup>c</sup> ± 1.12  | 22.45 <sup>d</sup> ± 0.30  | 30.79 <sup>a</sup> ± 8.25 |
| T1                                                                      | E30PP                    | 10.50 <sup>c</sup> ± 0.90  | 20.65 <sup>c</sup> ± 0.14  | 24.80 <sup>a</sup> ± 0.02 |
| T1                                                                      | E40PP                    | 9.81 <sup>abc</sup> ± 0.14 | 21.09 <sup>cd</sup> ± 0.26 | 26.97 <sup>a</sup> ± 3.78 |
| T2                                                                      | E0PP                     | 8.10 <sup>a</sup> ± 0.12   | 15.42 <sup>a</sup> ± 0.59  | 23.24 <sup>a</sup> ± 1.07 |
| T2                                                                      | E30PP                    | 8.08 <sup>a</sup> ± 0.46   | 18.52 <sup>b</sup> ± 0.80  | 22.51 <sup>a</sup> ± 2.05 |
| T2                                                                      | E40PP                    | 8.52 <sup>ab</sup> ± 0.01  | 19.73 <sup>bc</sup> ± 1.30 | 23.18 <sup>a</sup> ± 0.19 |



**Table S6:** Changes crumb cohesiveness of the tested bread during storage

| Kind of technologies                                                    | Type of preparation used | Cohesiveness (-)          |                           |                           |
|-------------------------------------------------------------------------|--------------------------|---------------------------|---------------------------|---------------------------|
|                                                                         |                          | Baking day                | After 24 hrs              | After 48 hrs              |
| Average value and differentiating based on different technology         |                          |                           |                           |                           |
| SB                                                                      |                          | 0.77 <sup>a</sup> ± 0.02  | 0.60 <sup>a</sup> ± 0.01  | 0.52 <sup>a</sup> ± 0     |
| T1                                                                      |                          | 0.78 <sup>a</sup> ± 0.02  | 0.62 <sup>b</sup> ± 0.01  | 0.52 <sup>a</sup> ± 0.02  |
| T2                                                                      |                          | 0.78 <sup>a</sup> ± 0.01  | 0.59 <sup>a</sup> ± 0.02  | 0.49 <sup>a</sup> ± 0.02  |
| Average value and differentiating based on the type of preparation used |                          |                           |                           |                           |
|                                                                         | SB                       | 0.77 <sup>a</sup> ± 0.02  | 0.60 <sup>a</sup> ± 0.01  | 0.52 <sup>a</sup> ± 0     |
|                                                                         | E0PP                     | 0.77 <sup>a</sup> ± 0.02  | 0.59 <sup>a</sup> ± 0.02  | 0.50 <sup>a</sup> ± 0.02  |
|                                                                         | E30PP                    | 0.79 <sup>b</sup> ± 0.01  | 0.61 <sup>a</sup> ± 0.02  | 0.51 <sup>a</sup> ± 0.01  |
|                                                                         | E40PP                    | 0.79 <sup>b</sup> ± 0.02  | 0.61 <sup>a</sup> ± 0.02  | 0.50 <sup>a</sup> ± 0.04  |
| Average value and differentiating based on mixed effect                 |                          |                           |                           |                           |
| SB                                                                      | SB                       | 0.77 <sup>ab</sup> ± 0.02 | 0.60 <sup>ab</sup> ± 0.01 | 0.52 <sup>ab</sup> ± 0.0  |
| T1                                                                      | E0PP                     | 0.75 <sup>a</sup> ± 0.01  | 0.61 <sup>ab</sup> ± 0.01 | 0.51 <sup>ab</sup> ± 0.01 |
| T1                                                                      | E30PP                    | 0.79 <sup>bc</sup> ± 0.01 | 0.63 <sup>b</sup> ± 0     | 0.51 <sup>ab</sup> ± 0.02 |
| T1                                                                      | E40PP                    | 0.80 <sup>c</sup> ± 0.01  | 0.62 <sup>b</sup> ± 0.02  | 0.53 <sup>b</sup> ± 0.02  |
| T2                                                                      | E0PP                     | 0.77 <sup>abc</sup> ± 0   | 0.58 <sup>a</sup> ± 0.02  | 0.49 <sup>ab</sup> ± 0.03 |
| T2                                                                      | E30PP                    | 0.79 <sup>bc</sup> ± 0.0  | 0.59 <sup>ab</sup> ± 0.0  | 0.51 <sup>ab</sup> ± 0.0  |
| T2                                                                      | E40PP                    | 0.78 <sup>abc</sup> ± 0.0 | 0.60 <sup>ab</sup> ± 0.01 | 0.47 <sup>a</sup> ± 0.03  |

**Table S7:** Chemical composition of obtained breads

| Kind of<br>technolo<br>gies                                             | Type of<br>preparat<br>ion used | Protein                                                         | Fat                       | Ash                      | Dietary fiber            |                          |                          |
|-------------------------------------------------------------------------|---------------------------------|-----------------------------------------------------------------|---------------------------|--------------------------|--------------------------|--------------------------|--------------------------|
|                                                                         |                                 | (g/ 100 g d.m.)                                                 |                           |                          |                          |                          |                          |
|                                                                         |                                 | Average value and differentiating based on different technology |                           |                          |                          |                          |                          |
| SB                                                                      |                                 | 10.69 <sup>a</sup> ± 0.03                                       | 1.92 <sup>c</sup> ± 0.02  | 2.77 <sup>a</sup> ± 0.01 | 2.49 <sup>a</sup> ± 0.06 | 2.28 <sup>a</sup> ± 0.03 | 4.77 <sup>a</sup> ± 0.03 |
| T1                                                                      |                                 | 10.75 <sup>a</sup> ± 0.10                                       | 1.88 <sup>b</sup> ± 0.13  | 2.82 <sup>b</sup> ± 0.05 | 3.04 <sup>b</sup> ± 0.35 | 2.78 <sup>b</sup> ± 0.30 | 5.82 <sup>b</sup> ± 0.65 |
| T2                                                                      |                                 | 10.87 <sup>b</sup> ± 0.05                                       | 1.79 <sup>a</sup> ± 0.10  | 2.84 <sup>c</sup> ± 0.06 | 3.13 <sup>c</sup> ± 0.36 | 2.83 <sup>b</sup> ± 0.30 | 5.96 <sup>c</sup> ± 0.66 |
| Average value and differentiating based on the type of preparation used |                                 |                                                                 |                           |                          |                          |                          |                          |
|                                                                         | SB                              | 10.69 <sup>a</sup> ± 0.03                                       | 1.92 <sup>c</sup> ± 0.02  | 2.77 <sup>a</sup> ± 0.01 | 2.49 <sup>a</sup> ± 0.06 | 2.28 <sup>a</sup> ± 0.03 | 4.77 <sup>a</sup> ± 0.03 |
|                                                                         | E0PP                            | 10.81 <sup>b</sup> ± 0.16                                       | 1.82 <sup>ab</sup> ± 0.17 | 2.77 <sup>a</sup> ± 0.01 | 2.71 <sup>b</sup> ± 0.05 | 2.44 <sup>b</sup> ± 0.05 | 5.15 <sup>b</sup> ± 0.08 |
|                                                                         | E30PP                           | 10.78 <sup>b</sup> ± 0.07                                       | 1.81 <sup>a</sup> ± 0.10  | 2.81 <sup>b</sup> ± 0.01 | 3.03 <sup>c</sup> ± 0.06 | 2.86 <sup>c</sup> ± 0.03 | 5.90 <sup>c</sup> ± 0.06 |
|                                                                         | E40PP                           | 10.84 <sup>b</sup> ± 0.02                                       | 1.87 <sup>bc</sup> ± 0.11 | 2.90 <sup>c</sup> ± 0.03 | 3.50 <sup>d</sup> ± 0.05 | 3.11 <sup>d</sup> ± 0.05 | 6.61 <sup>d</sup> ± 0.09 |
| Average value and differentiating based on mixed effect                 |                                 |                                                                 |                           |                          |                          |                          |                          |
| SB                                                                      | SB                              | 10.69 <sup>a</sup> ± 0.03                                       | 1.92 <sup>c</sup> ± 0.02  | 2.77 <sup>a</sup> ± 0.01 | 2.49 <sup>a</sup> ± 0.06 | 2.28 <sup>a</sup> ± 0.03 | 4.77 <sup>a</sup> ± 0.03 |
| T1                                                                      | E0PP                            | 10.68 <sup>a</sup> ± 0.11                                       | 1.96 <sup>c</sup> ± 0.03  | 2.76 <sup>a</sup> ± 0.02 | 2.68 <sup>b</sup> ± 0.03 | 2.41 <sup>b</sup> ± 0.02 | 5.09 <sup>b</sup> ± 0.02 |
| T1                                                                      | E30PP                           | 10.73 <sup>ab</sup> ± 0.05                                      | 1.72 <sup>ab</sup> ± 0.02 | 2.81 <sup>b</sup> ± 0    | 2.98 <sup>c</sup> ± 0.02 | 2.87 <sup>c</sup> ± 0.01 | 5.84 <sup>d</sup> ± 0.02 |
| T1                                                                      | E40PP                           | 10.86 <sup>c</sup> ± 0.02                                       | 1.96 <sup>c</sup> ± 0.04  | 2.87 <sup>c</sup> ± 0    | 3.46 <sup>d</sup> ± 0.02 | 3.07 <sup>d</sup> ± 0.01 | 6.53 <sup>f</sup> ± 0.01 |
| T2                                                                      | E0PP                            | 10.93 <sup>d</sup> ± 0.01                                       | 1.68 <sup>a</sup> ± 0.05  | 2.78 <sup>a</sup> ± 0    | 2.75 <sup>b</sup> ± 0.02 | 2.48 <sup>b</sup> ± 0.05 | 5.22 <sup>c</sup> ± 0.03 |
| T2                                                                      | E30PP                           | 10.84 <sup>bc</sup> ± 0.04                                      | 1.89 <sup>c</sup> ± 0.02  | 2.82 <sup>b</sup> ± 0.01 | 3.08 <sup>c</sup> ± 0.05 | 2.87 <sup>c</sup> ± 0.05 | 5.95 <sup>e</sup> ± 0    |
| T2                                                                      | E40PP                           | 10.83 <sup>bc</sup> ± 0.02                                      | 1.78 <sup>b</sup> ± 0.02  | 2.92 <sup>d</sup> ± 0    | 3.55 <sup>e</sup> ± 0.02 | 3.14 <sup>c</sup> ± 0.04 | 6.69 <sup>g</sup> ± 0.02 |
